# Supplementary material for: Variational formulation of perturbative explicitly-correlated coupled-cluster methods
Source: Royal Society of Chemistry journal article supplement (doi:10.1039/b803620a), 2008-01-01
Supplement: b803620a.pdf [file b803620a.pdf]

## Supplementary Information

### Variational formulation of perturbative explicitly correlated coupled cluster methods.

Martin Torheyden and Edward F. Valeev\*

*107 Davidson Hall, Department of Chemistry, Virginia Tech, Blacksburg, VA 24061, USA*

---

\*Electronic address: [evaleev@vt.edu](mailto:evaleev@vt.edu)

TABLE I: Experimental geometries for the test molecules. Taken from Ref.  
1. Bond lengths are given in Å and bond angles in degree.

| molecule                      | internal coordinate                | value <sup>1,2</sup> |
|-------------------------------|------------------------------------|----------------------|
| H <sub>2</sub>                | R <sub>HH</sub>                    | 0.74144              |
| HF                            | R <sub>HF</sub>                    | 0.91680(8)           |
| H <sub>2</sub> O              | R <sub>OH</sub>                    | 0.9572               |
|                               | ∠ <sub>HOH</sub>                   | 104.52               |
| HOF                           | R <sub>OH</sub>                    | 0.9657               |
|                               | R <sub>FO</sub>                    | 1.4350(31)           |
|                               | ∠ <sub>HOF</sub>                   | 97.54(50)            |
| H <sub>2</sub> O <sub>2</sub> | R <sub>OH</sub>                    | 0.967                |
|                               | R <sub>OO</sub>                    | 1.4556               |
|                               | ∠ <sub>HOO</sub>                   | 102.32               |
|                               | ∠ <sub>HOOH</sub>                  | 113.70 <sup>3</sup>  |
| HNC                           | R <sub>NH</sub>                    | 0.9940(8)            |
|                               | R <sub>CN</sub>                    | 1.1689(2)            |
| NH <sub>3</sub>               | R <sub>NH</sub>                    | 1.011(6)             |
|                               | ∠ <sub>HNH</sub>                   | 106.7                |
| N <sub>2</sub> H <sub>2</sub> | R <sub>NH</sub>                    | 1.029(1)             |
|                               | R <sub>NN</sub>                    | 1.247(1)             |
|                               | ∠ <sub>HNN</sub>                   | 106.3(2)             |
| C <sub>2</sub> H <sub>2</sub> | R <sub>CH</sub>                    | 1.06215(17)          |
|                               | R <sub>CC</sub>                    | 1.20257(9)           |
| HNO                           | R <sub>NH</sub> (R <sub>0</sub> )  | 1.062(8)             |
|                               | R <sub>NO</sub> (R <sub>0</sub> )  | 1.211(6)             |
|                               | ∠ <sub>HNO</sub> (θ <sub>0</sub> ) | 108.5(8)             |
| HCN                           | R <sub>CH</sub>                    | 1.06501(8)           |
|                               | R <sub>CN</sub>                    | 1.15324(2)           |
| C <sub>2</sub> H <sub>4</sub> | R <sub>CH</sub>                    | 1.081(2)             |
|                               | R <sub>CC</sub>                    | 1.334(2)             |
|                               | ∠ <sub>HCH</sub>                   | 117.37(33)           |
| CH <sub>4</sub>               | R <sub>CH</sub>                    | 1.0858(10)           |
| N <sub>2</sub>                | R <sub>NN</sub>                    | 1.09768(5)           |
| CH <sub>2</sub> O             | R <sub>CH</sub>                    | 1.1005(20)           |
|                               | R <sub>CO</sub>                    | 1.2033(10)           |
|                               | ∠ <sub>HCH</sub>                   | 116.30(25)           |
| CH <sub>2</sub>               | R <sub>CH</sub>                    | 1.107(2)             |
|                               | ∠ <sub>HCH</sub>                   | 102.4(4)             |
| CO                            | R <sub>CO</sub>                    | 1.12832              |
| CO <sub>2</sub>               | R <sub>CO</sub>                    | 1.15995              |
| O <sub>3</sub>                | R <sub>OO</sub>                    | 1.2717(2)            |
|                               | ∠ <sub>OOO</sub>                   | 116.78(33)           |
| F <sub>2</sub>                | R <sub>FF</sub>                    | 1.41193              |

<sup>1</sup> Bond lengths from table 15.3 of [1].

<sup>2</sup> Bond angles from table 15.8 of [1].

<sup>3</sup> Dihedral from original literature as cited below table 15.3 of [1].

TABLE IV: The valence correlation contributions to the electronic reaction energies,  $\Delta H_e^0(0K)$ , (in kJ/mol) for the 12 test reactions<sup>1</sup>.

|    | CCSD(T)     |                         | CCSD(T) <sub>R12</sub> |                         |       |                         |       |
|----|-------------|-------------------------|------------------------|-------------------------|-------|-------------------------|-------|
|    | E           | $\Delta_{\text{CBS}}^2$ | <i>d</i>               |                         | E     | $\Delta_{\text{CBS}}^2$ |       |
|    | E           | $\Delta_{\text{CBS}}^2$ | E                      | $\Delta_{\text{CBS}}^2$ | E     | $\Delta_{\text{CBS}}^2$ |       |
| 1  | aug-cc-pVDZ | -11.86                  | 11.98                  | -20.41                  | 3.43  | -21.12                  | 2.72  |
|    | aug-cc-pVTZ | -22.22                  | 1.62                   | -23.96                  | -0.12 | -23.86                  | -0.02 |
|    | CBS         | -23.84                  |                        | -23.84                  |       | -23.84                  |       |
| 2  | aug-cc-pVDZ | 3.07                    | 19.02                  | -13.62                  | 2.33  | -13.98                  | 1.98  |
|    | aug-cc-pVTZ | -14.42                  | 1.53                   | -17.60                  | -1.65 | -17.11                  | -1.16 |
|    | CBS         | -15.95                  |                        | -15.95                  |       | -15.95                  |       |
| 3  | aug-cc-pVDZ | 5.12                    | -2.23                  | 4.35                    | -3.00 | 4.92                    | -2.43 |
|    | aug-cc-pVTZ | 6.35                    | -1.00                  | 7.24                    | -0.11 | 7.23                    | -0.12 |
|    | CBS         | 7.35                    |                        | 7.35                    |       | 7.35                    |       |
| 4  | aug-cc-pVDZ | 13.72                   | 15.43                  | -1.55                   | 0.16  | -2.03                   | -0.33 |
|    | aug-cc-pVTZ | -3.26                   | -1.55                  | -2.94                   | -1.24 | -2.42                   | -0.71 |
|    | CBS         | -1.71                   |                        | -1.71                   |       | -1.71                   |       |
| 5  | aug-cc-pVDZ | 7.33                    | 10.17                  | -1.81                   | 1.03  | -2.17                   | 0.68  |
|    | aug-cc-pVTZ | -2.53                   | 0.31                   | -3.34                   | -0.50 | -3.08                   | -0.24 |
|    | CBS         | -2.84                   |                        | -2.84                   |       | -2.84                   |       |
| 6  | aug-cc-pVDZ | -4.53                   | 22.15                  | -22.22                  | 4.46  | -23.29                  | 3.40  |
|    | aug-cc-pVTZ | -24.75                  | 1.93                   | -27.30                  | -0.62 | -26.94                  | -0.26 |
|    | CBS         | -26.69                  |                        | -26.69                  |       | -26.69                  |       |
| 7  | aug-cc-pVDZ | 21.50                   | 12.51                  | 8.54                    | -0.45 | 8.21                    | -0.79 |
|    | aug-cc-pVTZ | 8.89                    | -0.10                  | 8.14                    | -0.86 | 8.38                    | -0.62 |
|    | CBS         | 8.99                    |                        | 8.99                    |       | 8.99                    |       |
| 8  | aug-cc-pVDZ | 34.98                   | 15.88                  | 20.19                   | 1.09  | 20.75                   | 1.65  |
|    | aug-cc-pVTZ | 22.80                   | 3.71                   | 18.30                   | -0.79 | 18.91                   | -0.18 |
|    | CBS         | 19.10                   |                        | 19.10                   |       | 19.10                   |       |
| 9  | aug-cc-pVDZ | 19.91                   | 0.61                   | 15.48                   | -3.82 | 16.37                   | -2.93 |
|    | aug-cc-pVTZ | 16.51                   | -2.79                  | 18.04                   | -1.26 | 18.14                   | -1.16 |
|    | CBS         | 19.30                   |                        | 19.30                   |       | 19.30                   |       |
| 10 | aug-cc-pVDZ | -33.94                  | 13.28                  | -45.38                  | 1.84  | -45.76                  | 1.46  |
|    | aug-cc-pVTZ | -43.11                  | 4.11                   | -46.88                  | 0.35  | -46.71                  | 0.51  |
|    | CBS         | -47.22                  |                        | -47.22                  |       | -47.22                  |       |
| 11 | aug-cc-pVDZ | 62.80                   | 12.04                  | 48.44                   | -2.32 | 50.37                   | -0.39 |
|    | aug-cc-pVTZ | 56.61                   | 5.86                   | 50.24                   | -0.52 | 51.28                   | 0.53  |
|    | CBS         | 50.75                   |                        | 50.75                   |       | 50.75                   |       |
| 12 | aug-cc-pVDZ | -82.68                  | 23.72                  | -101.89                 | 4.50  | -102.97                 | 3.42  |
|    | aug-cc-pVTZ | -96.38                  | 10.01                  | -104.55                 | 1.85  | -104.32                 | 2.07  |
|    | CBS         | -106.39                 |                        | -106.39                 |       | -106.39                 |       |

<sup>1</sup> See Table V in the main text.

<sup>2</sup> The difference between the respective reaction energy correlation contribution and the associated CBS value. The CBS value was obtained by Schwenke extrapolation[2] using the aug-cc-pVQZ and aug-cc-pV5Z basis sets. The CCSD correlation energy and the (T) correction were extrapolated separately.

TABLE II: The valence correlation energies (in  $mE_h$ ) of the 20 test molecules. CBS refers to the correlation energy obtained by the basis set extrapolation with Schwenke method[2] using aug-cc-pVQZ and aug-cc-pV5Z basis sets.

|                               | basis set   | CCSD    |      | CCSD(2) <sub>R12</sub> |      |         |      |
|-------------------------------|-------------|---------|------|------------------------|------|---------|------|
|                               |             | E       | %    | <i>d</i>               |      | E       | %    |
| H <sub>2</sub>                | aug-cc-pVDZ | -35.83  | 87.7 | -39.97                 | 97.8 | -39.99  | 97.8 |
|                               | aug-cc-pVTZ | -39.61  | 96.9 | -40.62                 | 99.4 | -40.68  | 99.5 |
|                               | CBS         | -40.88  |      | -40.88                 |      | -40.88  |      |
| CH <sub>2</sub>               | aug-cc-pVDZ | -143.22 | 81.5 | -168.70                | 96.0 | -169.83 | 96.7 |
|                               | aug-cc-pVTZ | -166.10 | 94.6 | -174.29                | 99.2 | -174.56 | 99.4 |
|                               | CBS         | -175.64 |      | -175.64                |      | -175.64 |      |
| CH <sub>4</sub>               | aug-cc-pVDZ | -191.03 | 82.0 | -225.01                | 96.6 | -226.30 | 97.2 |
|                               | aug-cc-pVTZ | -220.69 | 94.7 | -231.32                | 99.3 | -231.59 | 99.4 |
|                               | CBS         | -232.93 |      | -232.93                |      | -232.93 |      |
| H <sub>2</sub> O              | aug-cc-pVDZ | -227.11 | 76.2 | -290.27                | 97.4 | -291.51 | 97.8 |
|                               | aug-cc-pVTZ | -273.05 | 91.6 | -294.73                | 98.9 | -295.42 | 99.1 |
|                               | CBS         | -298.09 |      | -298.09                |      | -298.09 |      |
| NH <sub>3</sub>               | aug-cc-pVDZ | -214.32 | 79.5 | -261.00                | 96.9 | -262.32 | 97.3 |
|                               | aug-cc-pVTZ | -251.86 | 93.5 | -267.24                | 99.2 | -267.64 | 99.3 |
|                               | CBS         | -269.47 |      | -269.47                |      | -269.47 |      |
| HF                            | aug-cc-pVDZ | -225.97 | 72.0 | -307.61                | 98.0 | -308.81 | 98.4 |
|                               | aug-cc-pVTZ | -280.97 | 89.5 | -309.10                | 98.5 | -310.33 | 98.9 |
|                               | CBS         | -313.90 |      | -313.90                |      | -313.90 |      |
| N <sub>2</sub>                | aug-cc-pVDZ | -319.81 | 78.5 | -394.39                | 96.8 | -396.84 | 97.4 |
|                               | aug-cc-pVTZ | -376.88 | 92.5 | -403.42                | 99.0 | -404.21 | 99.2 |
|                               | CBS         | -407.57 |      | -407.57                |      | -407.57 |      |
| F <sub>2</sub>                | aug-cc-pVDZ | -435.45 | 72.5 | -589.12                | 98.0 | -592.25 | 98.5 |
|                               | aug-cc-pVTZ | -538.96 | 89.7 | -591.79                | 98.5 | -594.59 | 98.9 |
|                               | CBS         | -601.00 |      | -601.00                |      | -601.00 |      |
| CO                            | aug-cc-pVDZ | -306.29 | 77.4 | -384.26                | 97.1 | -386.34 | 97.6 |
|                               | aug-cc-pVTZ | -363.09 | 91.7 | -391.40                | 98.9 | -392.31 | 99.1 |
|                               | CBS         | -395.75 |      | -395.75                |      | -395.75 |      |
| HCN                           | aug-cc-pVDZ | -302.63 | 79.8 | -365.92                | 96.4 | -368.36 | 97.1 |
|                               | aug-cc-pVTZ | -353.51 | 93.2 | -376.22                | 99.2 | -376.80 | 99.3 |
|                               | CBS         | -379.43 |      | -379.43                |      | -379.43 |      |
| HNC                           | aug-cc-pVDZ | -295.73 | 79.5 | -359.09                | 96.6 | -361.42 | 97.2 |
|                               | aug-cc-pVTZ | -346.00 | 93.1 | -368.52                | 99.1 | -369.07 | 99.3 |
|                               | CBS         | -371.76 |      | -371.76                |      | -371.76 |      |
| C <sub>2</sub> H <sub>2</sub> | aug-cc-pVDZ | -278.86 | 80.5 | -332.70                | 96.0 | -335.58 | 96.8 |
|                               | aug-cc-pVTZ | -325.04 | 93.8 | -343.87                | 99.2 | -344.25 | 99.3 |
|                               | CBS         | -346.59 |      | -346.59                |      | -346.59 |      |
| C <sub>2</sub> H <sub>4</sub> | aug-cc-pVDZ | -313.83 | 81.3 | -372.11                | 96.4 | -374.79 | 97.1 |
|                               | aug-cc-pVTZ | -363.58 | 94.2 | -383.07                | 99.2 | -383.52 | 99.3 |
|                               | CBS         | -386.07 |      | -386.07                |      | -386.07 |      |
| CH <sub>2</sub> O             | aug-cc-pVDZ | -347.02 | 77.8 | -432.39                | 97.0 | -434.76 | 97.5 |
|                               | aug-cc-pVTZ | -411.35 | 92.3 | -441.33                | 99.0 | -442.27 | 99.2 |
|                               | CBS         | -445.85 |      | -445.85                |      | -445.85 |      |
| HNO                           | aug-cc-pVDZ | -379.09 | 77.6 | -475.01                | 97.2 | -477.76 | 97.8 |
|                               | aug-cc-pVTZ | -450.22 | 92.1 | -483.55                | 98.9 | -484.75 | 99.2 |
|                               | CBS         | -488.71 |      | -488.71                |      | -488.71 |      |
| N <sub>2</sub> H <sub>2</sub> | aug-cc-pVDZ | -363.11 | 79.1 | -444.16                | 96.8 | -446.94 | 97.4 |
|                               | aug-cc-pVTZ | -426.85 | 93.0 | -454.64                | 99.1 | -455.48 | 99.3 |
|                               | CBS         | -458.83 |      | -458.83                |      | -458.83 |      |
| HOF                           | aug-cc-pVDZ | -428.91 | 74.1 | -565.84                | 97.7 | -568.91 | 98.2 |
|                               | aug-cc-pVTZ | -524.15 | 90.5 | -571.37                | 98.7 | -573.52 | 99.0 |
|                               | CBS         | -579.14 |      | -579.14                |      | -579.14 |      |
| H <sub>2</sub> O <sub>2</sub> | aug-cc-pVDZ | -428.48 | 76.2 | -547.97                | 97.4 | -551.05 | 98.0 |
|                               | aug-cc-pVTZ | -514.97 | 91.6 | -556.16                | 98.9 | -557.70 | 99.2 |
|                               | CBS         | -562.45 |      | -562.45                |      | -562.45 |      |
| CO <sub>2</sub>               | aug-cc-pVDZ | -501.12 | 76.1 | -639.02                | 97.0 | -642.55 | 97.5 |
|                               | aug-cc-pVTZ | -601.18 | 91.2 | -651.26                | 98.8 | -652.86 | 99.1 |
|                               | CBS         | -658.84 |      | -658.84                |      | -658.84 |      |
| O <sub>3</sub>                | aug-cc-pVDZ | -640.95 | 77.6 | -807.34                | 97.7 | -812.12 | 98.3 |
|                               | aug-cc-pVTZ | -759.04 | 91.9 | -816.82                | 98.9 | -819.33 | 99.2 |
|                               | CBS         | -825.94 |      | -825.94                |      | -825.94 |      |

TABLE III: The valence correlation energies (in  $mE_h$ ) of the 20 test molecules. CBS refers to the correlation energy obtained by basis set extrapolation with Schwenke method[2] using aug-cc-pVQZ and aug-cc-pV5Z basis sets. The CCSD correlation energy and the (T) energy correction were extrapolated separately.

|                               | basis set   | CCSD(T) |      | CCSD(T) $_{RI2}$ |      |         |      |
|-------------------------------|-------------|---------|------|------------------|------|---------|------|
|                               |             | E       | %    | $d$              |      | E       | %    |
| H <sub>2</sub>                | aug-cc-pVDZ | -35.83  | 87.7 | -39.97           | 97.8 | -39.99  | 97.8 |
|                               | aug-cc-pVTZ | -39.61  | 96.9 | -40.62           | 99.4 | -40.68  | 99.5 |
|                               | CBS         | -40.88  |      | -40.88           |      | -40.88  |      |
| CH <sub>2</sub>               | aug-cc-pVDZ | -146.74 | 80.9 | -172.22          | 95.0 | -173.35 | 95.6 |
|                               | aug-cc-pVTZ | -171.19 | 94.4 | -179.38          | 98.9 | -179.65 | 99.1 |
|                               | CBS         | -181.31 |      | -181.31          |      | -181.31 |      |
| CH <sub>4</sub>               | aug-cc-pVDZ | -195.50 | 81.4 | -229.47          | 95.5 | -230.77 | 96.1 |
|                               | aug-cc-pVTZ | -227.22 | 94.6 | -237.85          | 99.0 | -238.12 | 99.1 |
|                               | CBS         | -240.17 |      | -240.17          |      | -240.17 |      |
| H <sub>2</sub> O              | aug-cc-pVDZ | -232.31 | 75.4 | -295.47          | 95.9 | -296.71 | 96.3 |
|                               | aug-cc-pVTZ | -281.68 | 91.5 | -303.35          | 98.5 | -304.04 | 98.7 |
|                               | CBS         | -307.96 |      | -307.96          |      | -307.96 |      |
| NH <sub>3</sub>               | aug-cc-pVDZ | -219.77 | 78.8 | -266.46          | 95.6 | -267.77 | 96.0 |
|                               | aug-cc-pVTZ | -260.19 | 93.3 | -275.57          | 98.8 | -275.97 | 99.0 |
|                               | CBS         | -278.79 |      | -278.79          |      | -278.79 |      |
| HF                            | aug-cc-pVDZ | -230.11 | 71.3 | -311.75          | 96.6 | -312.95 | 97.0 |
|                               | aug-cc-pVTZ | -288.48 | 89.4 | -316.61          | 98.1 | -317.84 | 98.5 |
|                               | CBS         | -322.74 |      | -322.74          |      | -322.74 |      |
| N <sub>2</sub>                | aug-cc-pVDZ | -333.22 | 77.7 | -407.80          | 95.1 | -410.26 | 95.7 |
|                               | aug-cc-pVTZ | -396.04 | 92.3 | -422.58          | 98.5 | -423.38 | 98.7 |
|                               | CBS         | -428.88 |      | -428.88          |      | -428.88 |      |
| F <sub>2</sub>                | aug-cc-pVDZ | -448.31 | 71.9 | -601.97          | 96.5 | -605.10 | 97.0 |
|                               | aug-cc-pVTZ | -558.91 | 89.6 | -611.75          | 98.0 | -614.54 | 98.5 |
|                               | CBS         | -623.94 |      | -623.94          |      | -623.94 |      |
| CO                            | aug-cc-pVDZ | -318.59 | 76.7 | -396.56          | 95.5 | -398.64 | 96.0 |
|                               | aug-cc-pVTZ | -380.63 | 91.6 | -408.95          | 98.5 | -409.86 | 98.7 |
|                               | CBS         | -415.34 |      | -415.34          |      | -415.34 |      |
| HCN                           | aug-cc-pVDZ | -315.97 | 79.0 | -379.26          | 94.9 | -381.70 | 95.5 |
|                               | aug-cc-pVTZ | -371.96 | 93.0 | -394.67          | 98.7 | -395.24 | 98.9 |
|                               | CBS         | -399.76 |      | -399.76          |      | -399.76 |      |
| HNC                           | aug-cc-pVDZ | -308.76 | 78.9 | -372.12          | 95.1 | -374.45 | 95.7 |
|                               | aug-cc-pVTZ | -363.90 | 93.0 | -386.42          | 98.7 | -386.97 | 98.9 |
|                               | CBS         | -391.46 |      | -391.46          |      | -391.46 |      |
| C <sub>2</sub> H <sub>2</sub> | aug-cc-pVDZ | -291.08 | 79.7 | -344.92          | 94.5 | -347.80 | 95.3 |
|                               | aug-cc-pVTZ | -341.90 | 93.7 | -360.72          | 98.8 | -361.11 | 98.9 |
|                               | CBS         | -365.06 |      | -365.06          |      | -365.06 |      |
| C <sub>2</sub> H <sub>4</sub> | aug-cc-pVDZ | -324.97 | 80.6 | -383.24          | 95.1 | -385.92 | 95.7 |
|                               | aug-cc-pVTZ | -379.09 | 94.0 | -398.58          | 98.9 | -399.04 | 99.0 |
|                               | CBS         | -403.14 |      | -403.14          |      | -403.14 |      |
| CH <sub>2</sub> O             | aug-cc-pVDZ | -358.94 | 77.1 | -444.31          | 95.5 | -446.68 | 96.0 |
|                               | aug-cc-pVTZ | -428.71 | 92.1 | -458.70          | 98.6 | -459.63 | 98.8 |
|                               | CBS         | -465.29 |      | -465.29          |      | -465.29 |      |
| HNO                           | aug-cc-pVDZ | -393.75 | 76.9 | -489.67          | 95.6 | -492.41 | 96.1 |
|                               | aug-cc-pVTZ | -471.33 | 92.0 | -504.66          | 98.5 | -505.86 | 98.7 |
|                               | CBS         | -512.27 |      | -512.27          |      | -512.27 |      |
| N <sub>2</sub> H <sub>2</sub> | aug-cc-pVDZ | -377.14 | 78.4 | -458.19          | 95.3 | -460.97 | 95.8 |
|                               | aug-cc-pVTZ | -446.77 | 92.9 | -474.57          | 98.7 | -475.40 | 98.9 |
|                               | CBS         | -480.93 |      | -480.93          |      | -480.93 |      |
| HOF                           | aug-cc-pVDZ | -441.75 | 73.4 | -578.68          | 96.2 | -581.75 | 96.7 |
|                               | aug-cc-pVTZ | -544.00 | 90.4 | -591.22          | 98.2 | -593.37 | 98.6 |
|                               | CBS         | -601.80 |      | -601.80          |      | -601.80 |      |
| H <sub>2</sub> O <sub>2</sub> | aug-cc-pVDZ | -441.63 | 75.4 | -561.12          | 95.9 | -564.19 | 96.4 |
|                               | aug-cc-pVTZ | -535.19 | 91.4 | -576.37          | 98.5 | -577.91 | 98.7 |
|                               | CBS         | -585.36 |      | -585.36          |      | -585.36 |      |
| CO <sub>2</sub>               | aug-cc-pVDZ | -522.03 | 75.4 | -659.93          | 95.4 | -663.46 | 95.9 |
|                               | aug-cc-pVTZ | -630.88 | 91.2 | -680.96          | 98.4 | -682.56 | 98.6 |
|                               | CBS         | -691.93 |      | -691.93          |      | -691.93 |      |
| O <sub>3</sub>                | aug-cc-pVDZ | -678.47 | 77.1 | -844.86          | 96.0 | -849.64 | 96.6 |
|                               | aug-cc-pVTZ | -808.38 | 91.9 | -866.16          | 98.4 | -868.67 | 98.7 |
|                               | CBS         | -879.83 |      | -879.83          |      | -879.83 |      |

TABLE V: The electronic reaction energies,  $\Delta H_e^0(0K)$ , (in kJ/mol) for the 12 test reactions<sup>1</sup>.

|    | CCSD(T)                   |                                  | CCSD(T) <sub>RI2</sub> |                                  |       |                                  |       |
|----|---------------------------|----------------------------------|------------------------|----------------------------------|-------|----------------------------------|-------|
|    | E                         | $\Delta_{\text{experimental}}^2$ | E                      | $\Delta_{\text{experimental}}^2$ | E     | $\Delta_{\text{experimental}}^2$ |       |
| 1  | aug-cc-pVDZ <sup>2</sup>  | -18.20                           | 3.6                    | -26.74                           | -4.9  | -27.46                           | -5.7  |
|    | aug-cc-pVTZ <sup>2</sup>  | -22.62                           | -0.8                   | -24.37                           | -2.6  | -24.26                           | -2.5  |
|    | experimental <sup>1</sup> | -21.8                            |                        | -21.8                            |       | -21.8                            |       |
| 2  | aug-cc-pVDZ <sup>2</sup>  | -166.06                          | -0.7                   | -182.75                          | -17.3 | -183.11                          | -17.7 |
|    | aug-cc-pVTZ <sup>2</sup>  | -165.52                          | -0.1                   | -168.69                          | -3.3  | -168.21                          | -2.8  |
|    | experimental <sup>1</sup> | -165.4                           |                        | -165.4                           |       | -165.4                           |       |
| 3  | aug-cc-pVDZ <sup>2</sup>  | -220.93                          | -17.0                  | -221.69                          | -17.8 | -221.13                          | -17.2 |
|    | aug-cc-pVTZ <sup>2</sup>  | -206.94                          | -3.0                   | -206.05                          | -2.2  | -206.06                          | -2.2  |
|    | experimental <sup>1</sup> | -203.9                           |                        | -203.9                           |       | -203.9                           |       |
| 4  | aug-cc-pVDZ <sup>2</sup>  | -261.00                          | -15.7                  | -276.27                          | -31.0 | -276.76                          | -31.5 |
|    | aug-cc-pVTZ <sup>2</sup>  | -248.69                          | -3.4                   | -248.37                          | -3.1  | -247.85                          | -2.5  |
|    | experimental <sup>1</sup> | -245.3                           |                        | -245.3                           |       | -245.3                           |       |
| 5  | aug-cc-pVDZ <sup>2</sup>  | -251.16                          | 0.7                    | -260.30                          | -8.4  | -260.66                          | -8.8  |
|    | aug-cc-pVTZ <sup>2</sup>  | -250.75                          | 1.1                    | -251.56                          | 0.3   | -251.30                          | 0.6   |
|    | experimental <sup>1</sup> | -251.9                           |                        | -251.9                           |       | -251.9                           |       |
| 6  | aug-cc-pVDZ <sup>2</sup>  | -269.36                          | 4.4                    | -287.05                          | -13.2 | -288.12                          | -14.3 |
|    | aug-cc-pVTZ <sup>2</sup>  | -273.37                          | 0.4                    | -275.92                          | -2.1  | -275.57                          | -1.8  |
|    | experimental <sup>1</sup> | -273.8                           |                        | -273.8                           |       | -273.8                           |       |
| 7  | aug-cc-pVDZ <sup>2</sup>  | -323.58                          | -3.3                   | -336.54                          | -16.2 | -336.87                          | -16.6 |
|    | aug-cc-pVTZ <sup>2</sup>  | -322.22                          | -1.9                   | -322.97                          | -2.7  | -322.73                          | -2.4  |
|    | experimental <sup>1</sup> | -320.3                           |                        | -320.3                           |       | -320.3                           |       |
| 8  | aug-cc-pVDZ <sup>2</sup>  | -438.17                          | 7.4                    | -452.96                          | -7.4  | -452.40                          | -6.8  |
|    | aug-cc-pVTZ <sup>2</sup>  | -442.92                          | 2.7                    | -447.42                          | -1.8  | -446.81                          | -1.2  |
|    | experimental <sup>1</sup> | -445.6                           |                        | -445.6                           |       | -445.6                           |       |
| 9  | aug-cc-pVDZ <sup>2</sup>  | -464.05                          | -17.4                  | -468.48                          | -21.8 | -467.60                          | -20.9 |
|    | aug-cc-pVTZ <sup>2</sup>  | -451.03                          | -4.3                   | -449.51                          | -2.8  | -449.41                          | -2.7  |
|    | experimental <sup>1</sup> | -446.7                           |                        | -446.7                           |       | -446.7                           |       |
| 10 | aug-cc-pVDZ <sup>2</sup>  | -526.86                          | 17.3                   | -538.30                          | 5.9   | -538.68                          | 5.5   |
|    | aug-cc-pVTZ <sup>2</sup>  | -538.26                          | 5.9                    | -542.02                          | 2.2   | -541.85                          | 2.3   |
|    | experimental <sup>1</sup> | -544.2                           |                        | -544.2                           |       | -544.2                           |       |
| 11 | aug-cc-pVDZ <sup>2</sup>  | -567.39                          | -2.5                   | -581.75                          | -16.9 | -579.82                          | -14.9 |
|    | aug-cc-pVTZ <sup>2</sup>  | -560.45                          | 4.4                    | -566.83                          | -1.9  | -565.78                          | -0.9  |
|    | experimental <sup>1</sup> | -564.9                           |                        | -564.9                           |       | -564.9                           |       |
| 12 | aug-cc-pVDZ <sup>2</sup>  | -810.59                          | 35.1                   | -829.80                          | 15.9  | -830.88                          | 14.8  |
|    | aug-cc-pVTZ <sup>2</sup>  | -832.42                          | 13.3                   | -840.59                          | 5.1   | -840.36                          | 5.3   |
|    | experimental <sup>1</sup> | -845.7                           |                        | -845.7                           |       | -845.7                           |       |

<sup>1</sup> The valence correlation energy plus the Hartree-Fock energy computed in the given basis set plus core correlation energy from Table V in the main text.

<sup>2</sup> The difference between the computed reaction energy and the experimental value.

TABLE VI: The electronic reaction energies,  $\Delta H_e^0(0K)$ , (in kJ/mol) for the 12 test reactions<sup>1</sup>.

|                             | CCSD(T) |                                  | CCSD(T) $_{\overline{RI2}}$ |                                  |         |                                  |
|-----------------------------|---------|----------------------------------|-----------------------------|----------------------------------|---------|----------------------------------|
|                             | E       | $\Delta_{\text{experimental}}^2$ | E                           | $\Delta_{\text{experimental}}^2$ | E       | $\Delta_{\text{experimental}}^2$ |
| 1 aug-cc-pVDZ <sup>2</sup>  | -10.54  | 11.3                             | -19.09                      | 2.7                              | -19.80  | 2.0                              |
| aug-cc-pVTZ <sup>2</sup>    | -20.90  | 0.9                              | -22.64                      | -0.8                             | -22.54  | -0.7                             |
| experimental <sup>1</sup>   | -21.8   |                                  | -21.8                       |                                  | -21.8   |                                  |
| 2 aug-cc-pVDZ <sup>2</sup>  | -145.49 | 19.9                             | -162.18                     | 3.2                              | -162.54 | 2.9                              |
| aug-cc-pVTZ <sup>2</sup>    | -162.98 | 2.4                              | -166.16                     | -0.8                             | -165.67 | -0.3                             |
| experimental <sup>1</sup>   | -165.4  |                                  | -165.4                      |                                  | -165.4  |                                  |
| 3 aug-cc-pVDZ <sup>2</sup>  | -207.74 | -3.8                             | -208.50                     | -4.6                             | -207.94 | -4.0                             |
| aug-cc-pVTZ <sup>2</sup>    | -206.50 | -2.6                             | -205.62                     | -1.7                             | -205.63 | -1.7                             |
| experimental <sup>1</sup>   | -203.9  |                                  | -203.9                      |                                  | -203.9  |                                  |
| 4 aug-cc-pVDZ <sup>2</sup>  | -228.79 | 16.5                             | -244.06                     | 1.2                              | -244.55 | 0.8                              |
| aug-cc-pVTZ <sup>2</sup>    | -245.77 | -0.5                             | -245.46                     | -0.2                             | -244.93 | 0.4                              |
| experimental <sup>1</sup>   | -245.3  |                                  | -245.3                      |                                  | -245.3  |                                  |
| 5 aug-cc-pVDZ <sup>2</sup>  | -240.15 | 11.7                             | -249.29                     | 2.6                              | -249.65 | 2.3                              |
| aug-cc-pVTZ <sup>2</sup>    | -250.01 | 1.9                              | -250.82                     | 1.1                              | -250.56 | 1.3                              |
| experimental <sup>1</sup>   | -251.9  |                                  | -251.9                      |                                  | -251.9  |                                  |
| 6 aug-cc-pVDZ <sup>2</sup>  | -250.69 | 23.1                             | -268.38                     | 5.4                              | -269.45 | 4.4                              |
| aug-cc-pVTZ <sup>2</sup>    | -270.91 | 2.9                              | -273.46                     | 0.3                              | -273.10 | 0.7                              |
| experimental <sup>1</sup>   | -273.8  |                                  | -273.8                      |                                  | -273.8  |                                  |
| 7 aug-cc-pVDZ <sup>2</sup>  | -308.36 | 11.9                             | -321.32                     | -1.0                             | -321.65 | -1.4                             |
| aug-cc-pVTZ <sup>2</sup>    | -320.97 | -0.7                             | -321.73                     | -1.4                             | -321.48 | -1.2                             |
| experimental <sup>1</sup>   | -320.3  |                                  | -320.3                      |                                  | -320.3  |                                  |
| 8 aug-cc-pVDZ <sup>2</sup>  | -430.17 | 15.4                             | -444.97                     | 0.6                              | -444.41 | 1.2                              |
| aug-cc-pVTZ <sup>2</sup>    | -442.35 | 3.2                              | -446.85                     | -1.3                             | -446.24 | -0.6                             |
| experimental <sup>1</sup>   | -445.6  |                                  | -445.6                      |                                  | -445.6  |                                  |
| 9 aug-cc-pVDZ <sup>2</sup>  | -446.45 | 0.2                              | -450.88                     | -4.2                             | -450.00 | -3.3                             |
| aug-cc-pVTZ <sup>2</sup>    | -449.85 | -3.2                             | -448.33                     | -1.6                             | -448.23 | -1.5                             |
| experimental <sup>1</sup>   | -446.7  |                                  | -446.7                      |                                  | -446.7  |                                  |
| 10 aug-cc-pVDZ <sup>2</sup> | -529.56 | 14.6                             | -541.00                     | 3.2                              | -541.38 | 2.8                              |
| aug-cc-pVTZ <sup>2</sup>    | -538.73 | 5.5                              | -542.49                     | 1.7                              | -542.32 | 1.9                              |
| experimental <sup>1</sup>   | -544.2  |                                  | -544.2                      |                                  | -544.2  |                                  |
| 11 aug-cc-pVDZ <sup>2</sup> | -554.64 | 10.3                             | -569.01                     | -4.1                             | -567.07 | -2.2                             |
| aug-cc-pVTZ <sup>2</sup>    | -560.83 | 4.1                              | -567.21                     | -2.3                             | -566.16 | -1.3                             |
| experimental <sup>1</sup>   | -564.9  |                                  | -564.9                      |                                  | -564.9  |                                  |
| 12 aug-cc-pVDZ <sup>2</sup> | -820.40 | 25.3                             | -839.61                     | 6.1                              | -840.69 | 5.0                              |
| aug-cc-pVTZ <sup>2</sup>    | -834.11 | 11.6                             | -842.27                     | 3.4                              | -842.04 | 3.7                              |
| experimental <sup>1</sup>   | -845.7  |                                  | -845.7                      |                                  | -845.7  |                                  |

[1] T. Helgaker, P. Jørgensen, and J. Olsen, *Modern Electronic Structure Theory* (Wiley, Chichester, 2000), 1st ed.

[2] D. W. Schwenke, J. Chem. Phys. **122**, 014107 (2005).

<sup>1</sup> The valence correlation energy in the given basis plus the CBS Hartree Fock energy plus the core-correlation energy, both found in Table V in the main text.

<sup>2</sup> The difference between the computed reaction energy and the corresponding experimental value.
